# Supplementary material for: Do Water, Sanitation and Hygiene Conditions in Primary Schools Consistently Support Schoolgirls’ Menstrual Needs? A Longitudinal Study in Rural Western Kenya
Source: Int J Environ Res Public Health. 2018 Aug 7;15(8):1682. doi: 10.3390/ijerph15081682 (PMC6121484; doi:10.3390/ijerph15081682)

# KEMRI/CDC DSS WASH-School survey Form

File number





CI ☐ GemVisit date  /  / 

Fill for all participating schools

School name: *Schname*















School ID

*SchID* 

GIS Location

longitude  *gis\_long*P.O. Box *schbox*





Postal code *pcode*





Town *stown*










latitude  *gis\_lat*
**Environment:** *sch\_env* ☐ Rural(countryside) ☐ Urban(Houses all sides) ☐ Periurban(some houses)

**Skul oyaw** (School open) *sch\_open* ☐ Ee (Yes) ☐ Ooyo (No) If No, why \_\_\_\_\_ *sch\_why*

\*If "NO", then the interviewer STOPS here. If "Yes" proceed to Q.1

a) Was water for hand washing observed upon arrival? *arrival\_hand* ☐ Ee (Yes) ☐ Ooyo (No)

b) Was soap seen at handwashing station upon arrival? *soap\_arrival* ☐ Ee (Yes) ☐ Ooyo (No)

1. **Ute mag somo adi mantie e skul?**(How many classrooms are there in the school?)  *hwcl\_sch*

2. **Adi kuomgi mitiyogo kawuono?**(How many classrooms are in use today?)  *hwcl\_sch\_tdy*

3. **Jopuonj adi mantiere e skul kawuono?**(How many teachers are there at the school today?(full-time,part-time)?

Seche duto(FT)



*tch\_ft*

Seche moko(PT)



*tch\_pt*

## QUESTION TO TEACHERS:

4. Which teacher helped provide information on WASH today: *wch\_teacher*
☐ Head teacher ☐ Full time teacher ☐ Part-time teacher ☐ Focal point teacher for study

5. **Skul thoro chiwo pii mar luoko lwedo marom nadi(ndik kaka japuonj oduoki pinyka)** *hw\_often\_water*  
How often does the school supply water for handwashing?

☐ Onge(Never) ☐ Seche duto(Always) ☐ Seche moko(Sometimes):how often  *hw\_often\_frq*  
( In a month )

6. **Bende pii mar luoko lwedo nitie kawuono?**(penjoni penj japuonj) (Is there water available for hand-washing today? *Is\_water*
☐ Ee (Yes) ☐ Ooyo (No)
Verified ☐

|  |  |  |  |  |
|--|--|--|--|--|
|  |  |  |  |  |
|--|--|--|--|--|

7. **Skul thoro chiwo sabun mar luoko lwedo marom nadi?(ndik kaka japuonj oduoki pinyka)** *hwsoap\_freq*  
How often does the school supply soap for handwashing?(write reported frequency below.)
- ☐ Onge(Never)    ☐ Seche duto(Always)    ☐ Seche moko(Sometimes) :how often 



*hw\_often\_soap*  
(In a month)
8. **Bende nitiere sabun/pii motimo sabun mar luoko lwedo kawuono?(Penjoni penj japuonj)( Is there soap/soapy water available for hand washing today(Question to teacher)?** *Is\_soap*
- ☐ Ee (Yes)    ☐ Ooyo (No)
9. How often does the school have cleaning supplies for the latrines?(write reported frequency below.) *hw\_often\_clean*
- ☐ Onge(Never)    ☐ Seche duto(Always)    ☐ Seche moko(Sometimes) :how often 



*hwclean\_freq*  
(In a month)
10. Are there cleaning supplies available for latrine cleaning today?*are\_cln\_supplies*    ☐ Ee (Yes)    ☐ Ooyo (No)
11. **Bende skul chiwoga gik ler ma nyiri tiyogo ka gidhi e dwe?**(Does the school currently provide sanitary towels for girls? *prov\_sani*  
If Yes or sometimes go to Q13    ☐ Seche moko(Sometimes)    ☐ Ee (Yes)    ☐ Ooyo (No)
12. **Ka ooyo,chiw ler gimomiyo ok chiew pamba maler?**(If NO,describe why pads are not given to girls?  
*pad\_notgiven*  
-----  
-----
13. **Ka seche moko kata ee,chiw ler ni ka ang'o motimore,kara ang'o,gi l thoro chiwo pamba maler ne nyiri maromo nadi?**(If sometimes or yes,describe under what circumstances,when and how often pads are given to girls? *desc\_somt* -----  
-----
14. **Bende nitie pii ma joma nyiri nyalo luokogo lepgi kapo ni otimo lowo?**(Is there water available for girls to wash if they soil their clothes? *iswater\_soil*  
If Yes or sometimes go to Q16    ☐ Seche moko(Sometimes)    ☐ Ee (Yes)    ☐ Ooyo (No)
15. **Ka ooyo,chiw ler gimomiyo ok chiew pii ne nyiri?**(If NO,describe why water isn't available for girls ?  
*water\_notgiven*  
-----  
-----

|  |  |  |  |  |
|--|--|--|--|--|
|  |  |  |  |  |
|--|--|--|--|--|

16. **Kaa ee chiw ler(kuom ranyisi:bende pii okan ei choo kata machiegni gi choo mar nyiri?**(If yes or sometimes describe(For example:Is water kept in or near the girls latrine?) if\_des
- 
- 

### OBSERVATION ONLY QUESTIONS

17. **Rang ane ni choche kod kuonde olo pii adi mantiere e skul ?**(Observe how many latrines and urinals with doorway unblocked or unlocked serve the school today?)

*Fill table below per every latrine door*

| <b>User:    1.Girls    2.Boys    3.Shared    4.Teacher</b><br><b>Type of latrine:    1.Pit    2.VIP    3.Ecosan    4.Toilet    5.Urinal</b> |                      |                 |                        |                       |                        |               |                          |
|---------------------------------------------------------------------------------------------------------------------------------------------|----------------------|-----------------|------------------------|-----------------------|------------------------|---------------|--------------------------|
| User<br>(enter code)                                                                                                                        | Type<br>(enter code) | Stable<br>(Y,N) | Holes in wall<br>(Y,N) | Strong smell<br>(Y,N) | Feces or<br>urine(Y,N) | Door<br>(Y,N) | Door locks<br>inside Y,N |
|                                                                                                                                             |                      |                 |                        |                       |                        |               |                          |
|                                                                                                                                             |                      |                 |                        |                       |                        |               |                          |
|                                                                                                                                             |                      |                 |                        |                       |                        |               |                          |
|                                                                                                                                             |                      |                 |                        |                       |                        |               |                          |
|                                                                                                                                             |                      |                 |                        |                       |                        |               |                          |

*lat\_user    lat\_type    lat\_stable    wall\_holes    lat\_smell    lat\_urine    lat\_door    lat\_lock*

### 18. **Observations on Facilities for girls**

- a). Are girls latrines in separate bank from boys? *separate\_bank*      ☐ Ee (Yes)      ☐ Ooyo (No)
- b). Is there a privacy wall at girls latrines? *private\_latrine*      ☐ Ee (Yes)      ☐ Ooyo (No)
- c). Is there washing water available today in *washing\_water* or very near girls latrines?      ☐ Ee (Yes)      ☐ Ooyo (No)
- d). Is there a private place where girls can *girls\_change* change or wash      ☐ Ee (Yes)      ☐ Ooyo (No)
- e). If yes to question c or d describe *cd\_describe*
- 
-

|  |  |  |  |  |
|--|--|--|--|--|
|  |  |  |  |  |
|--|--|--|--|--|

19. Are there any facilities for hand washing ? *handwash\_facility*

☐ Ee (Yes) ☐ Ooyo (No)

If No go to Q22

20. Observation questions(Fill the table below for containers with water inside)

|            |                                                                                                                                                |
|------------|------------------------------------------------------------------------------------------------------------------------------------------------|
| Type:      | 1.Bucket    2.Container with tap<br>3.Leaky tin/tippy tap    4.Other(specify)                                                                  |
| Location:  | 1.In girls latrine    2.Near girls latrine    3.Near boys latrine<br>4.Near latrines,generally    5.Near teachers latrine    6.Near classrooms |
| Soap type: | 1.Bar    2.Soapy water<br>3.Powdered soap    4.Ash<br>5.Other(specify)                                                                         |

| Cont | Type<br>(enter code) | If other,specify  | Location<br>(enter code) | Soap next to<br>container Y,N | If yes soap<br>type:(enter<br>code) | If other,specify  |
|------|----------------------|-------------------|--------------------------|-------------------------------|-------------------------------------|-------------------|
| 1    |                      |                   |                          |                               |                                     |                   |
| 2    |                      |                   |                          |                               |                                     |                   |
| 3    |                      |                   |                          |                               |                                     |                   |
| 4    |                      |                   |                          |                               |                                     |                   |
| 5    |                      |                   |                          |                               |                                     |                   |
|      | <i>cont_type</i>     | <i>cont_other</i> | <i>cont_loc</i>          | <i>soap_next</i>              | <i>soap_type</i>                    | <i>soap_other</i> |

21. Hand washing observation during break-time(11-11:30):

|                        | Boys             | Girls            | Teachers         |
|------------------------|------------------|------------------|------------------|
| Used facility          | <i>bfacility</i> | <i>gfacility</i> | <i>tfacility</i> |
| Washed hands           | <i>bwash</i>     | <i>gwash</i>     | <i>twash</i>     |
| Washed hands with soap | <i>soapb</i>     | <i>soapg</i>     | <i>soapt</i>     |

☐

|  |  |  |  |  |
|--|--|--|--|--|
|  |  |  |  |  |
|--|--|--|--|--|

22. If applicable, how are sanitary pads disposed of at the school? sanitary\_disposed

- ☐ In pits  
☐ In buckets(observe)  
☐ Girls take them back home in bag(observe)  
☐ Rubbish pit-burned each day  
☐ Dont know

Others(Mamoko) \_\_\_\_\_  
disposed other

23. **Bende nitie gik yweyo/lwoko choo mondo obed maler**(Are there cleaning supplies seen for latrine cleaning? sup\_seen

- ☐ Ee inyalo nee(Yes,seen)    ☐ Ee Owachna gi japuonj to ok aneno(Yes,Not seen)    ☐ Ooyo (No)

24. **Ka ineno,chan-gi piny ka:** (If seen,list:)seen\_list

-----

**Other WASH observations** Other\_wash

|  |
|--|
|  |
|  |
|  |
|  |
|  |
|  |
|  |
|  |
|  |

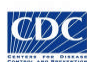

Safer, healthier people. Research for health solutions

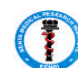

Supplement: Supplementary file 1 [file ijerph-15-01682-s001.pdf]
